# Supplementary material
Source: publisher site journal article supplement (https://www.spandidos-publications.com/5067/downloadSupplementary)

Figure S1. Detection of GBP2 knockdown and overexpression and STAT1 knockdown efficiency in Caki-1 and 786-O cells. (A-H) Reverse transcription-quantitative PCR and western blotting were used to verify GBP2 mRNA expression and protein expression respectively to detect the efficiency of knockdown and overexpression in Caki-1 and 786-O cells. (I) Western blotting was used to verify STAT1 and p-STAT1 (Ser 727) protein expression to detect the efficiency of STAT1 knockdown in Caki-1 and 786-O cells. Data are expressed as the mean  $\pm$  SD of three independent experiments. \*\* $P < 0.01$  and \*\*\* $P < 0.001$ . GBP 2, guanylate-binding protein 2; WT, wild-type; OE, overexpression; sh, short hairpin; p-, phosphorylated; NC, negative control; n.s., not significant.

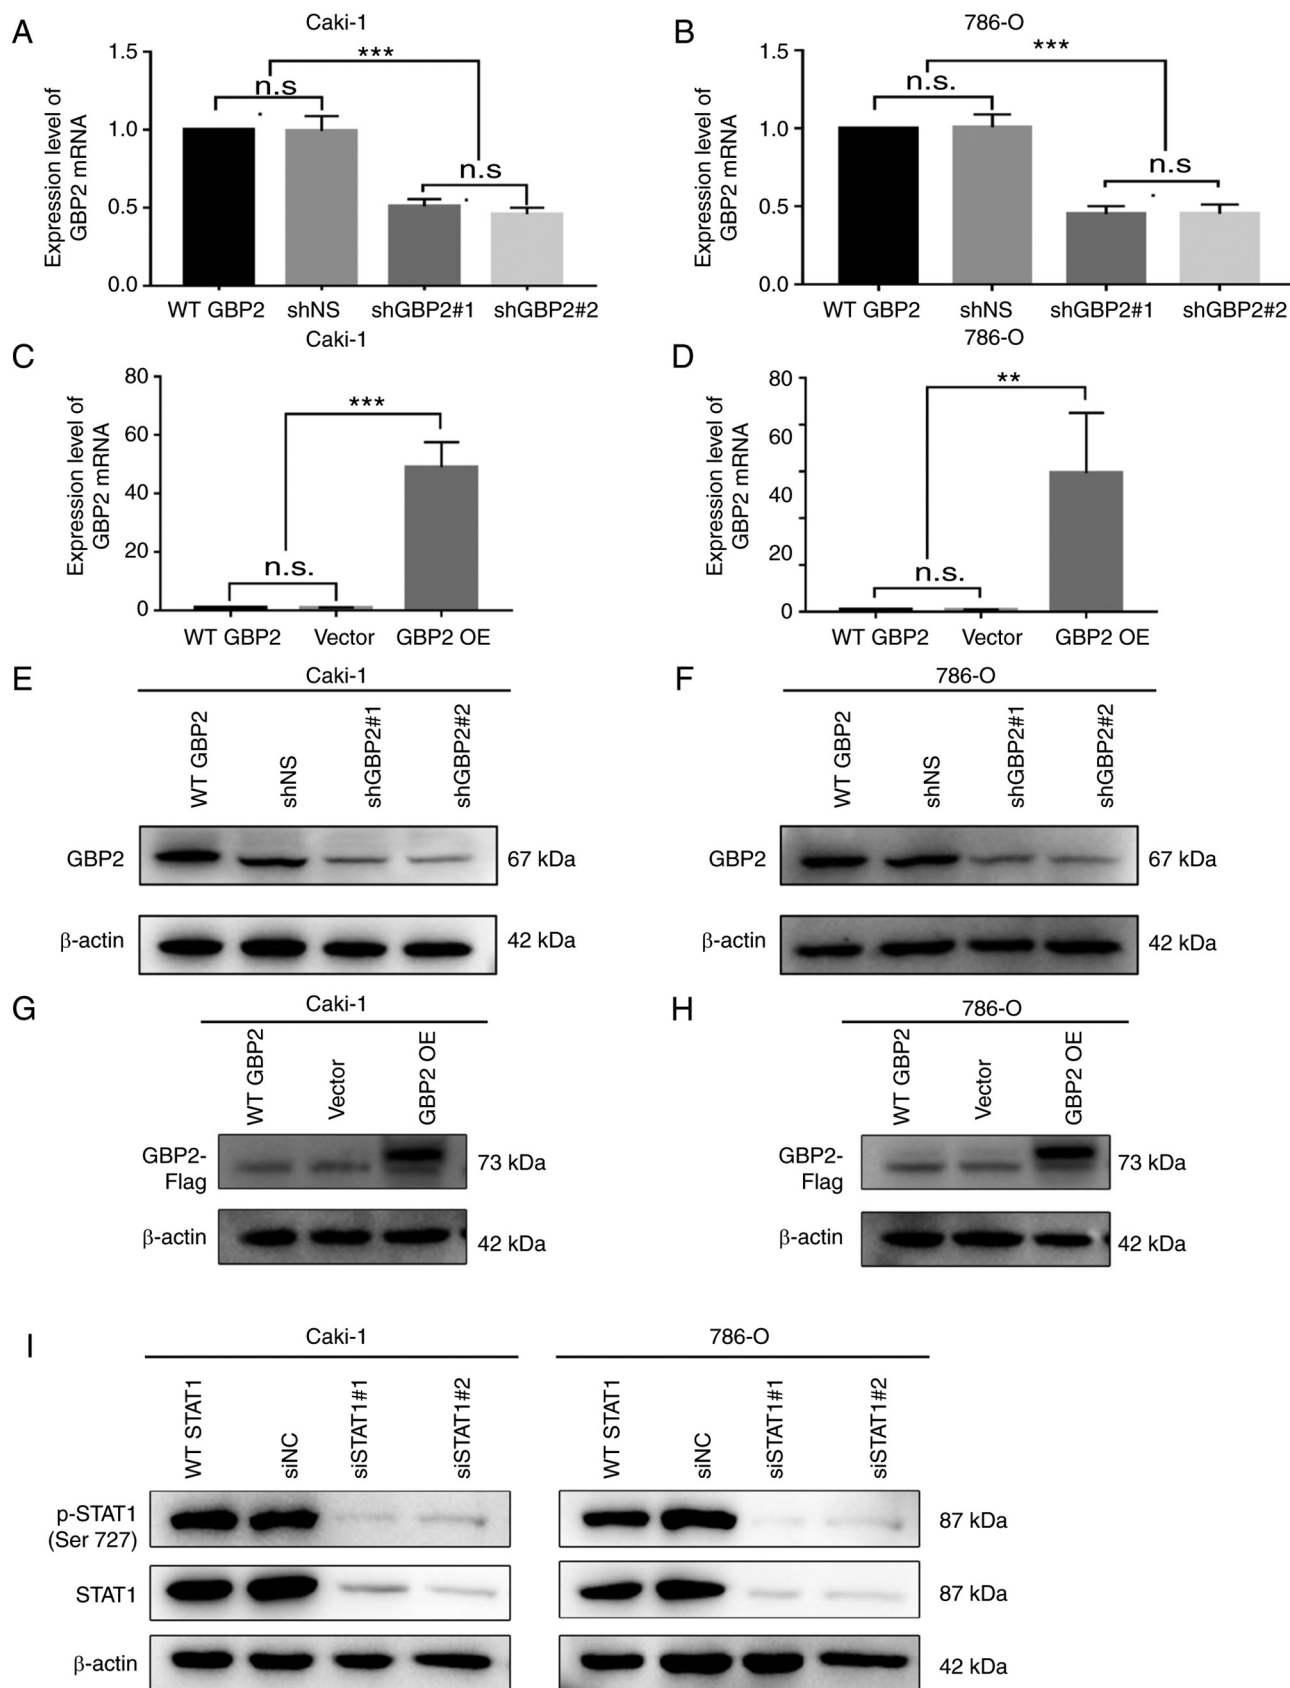

Supplement: Supplementary file 1 [file downloadSupplementary]
